# Supplementary material
Source: PubMed Central journal article supplement (PMC1142438)

**A**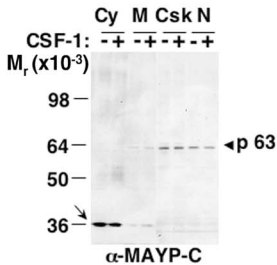**B**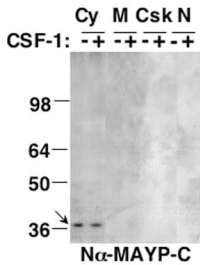**C**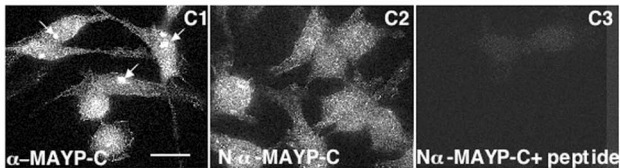

Supplement: mbc_E04-10-0914_1.pdf [file mbc_E04-10-0914_1.pdf]

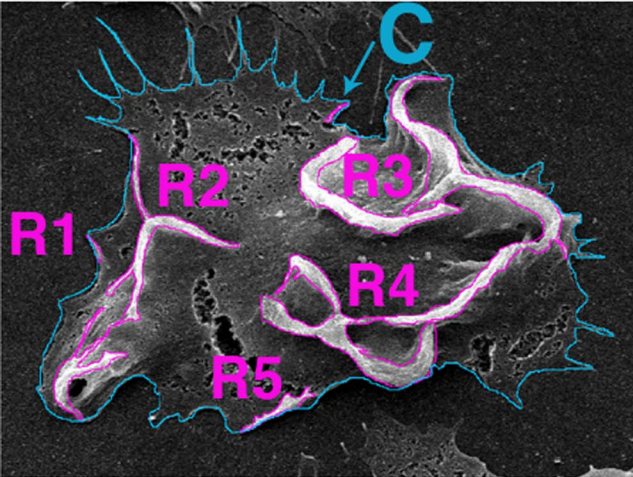

$$R = R1 + R2 + R3 + R4 + R5$$

Supplement: mbc_E04-10-0914_2.pdf [file mbc_E04-10-0914_2.pdf]

**A** $M_r$  ( $\times 10^{-3}$ )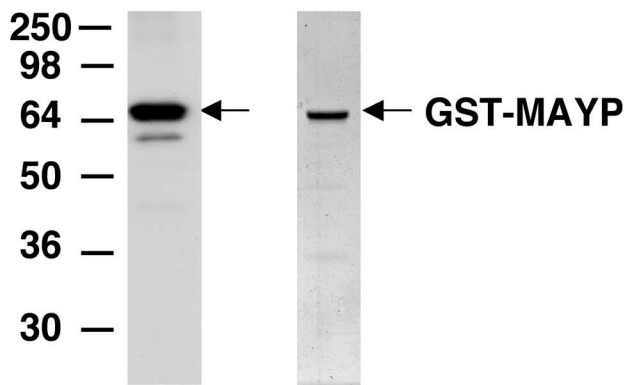

WB: MAYP    Coomassie

**B**

Actin

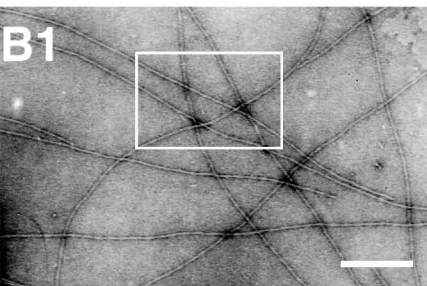

B1

Actin+GST-MAYP

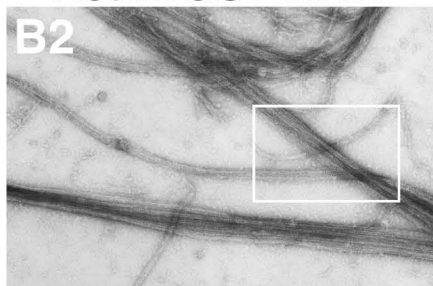

B2

Actin+GST

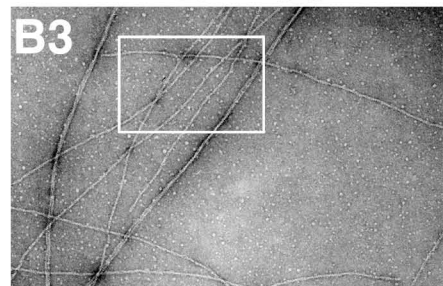

B3

B4

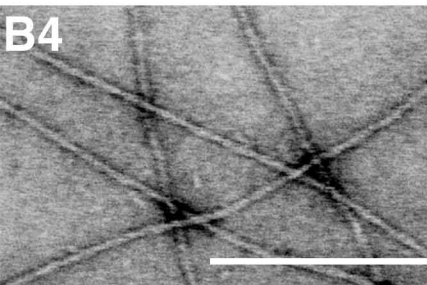

B5

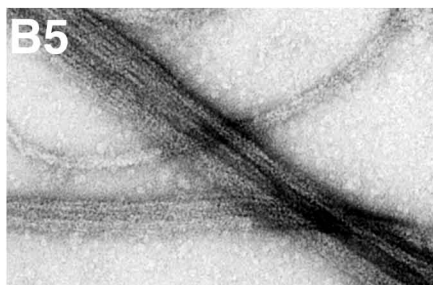

B6

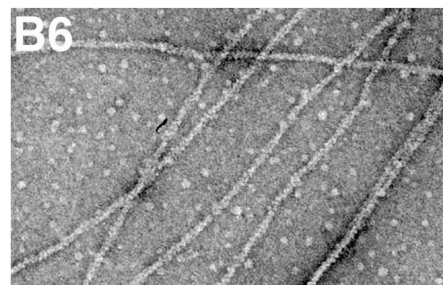

Supplement: mbc_E04-10-0914_3.pdf [file mbc_E04-10-0914_3.pdf]

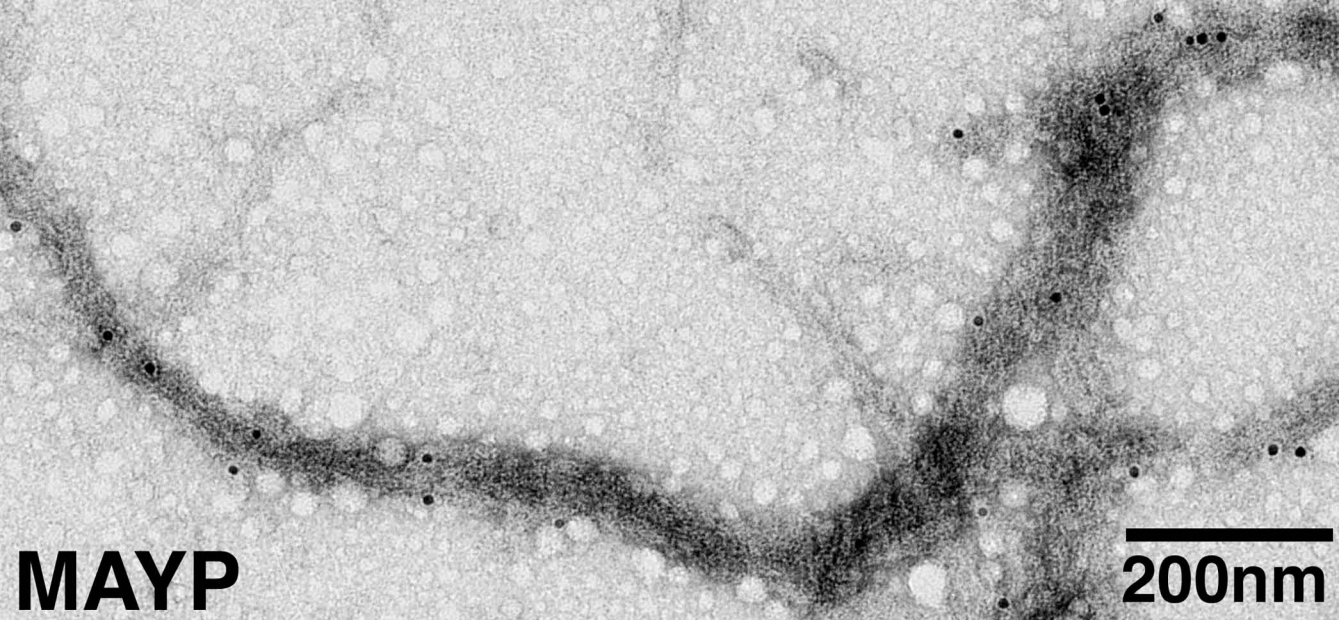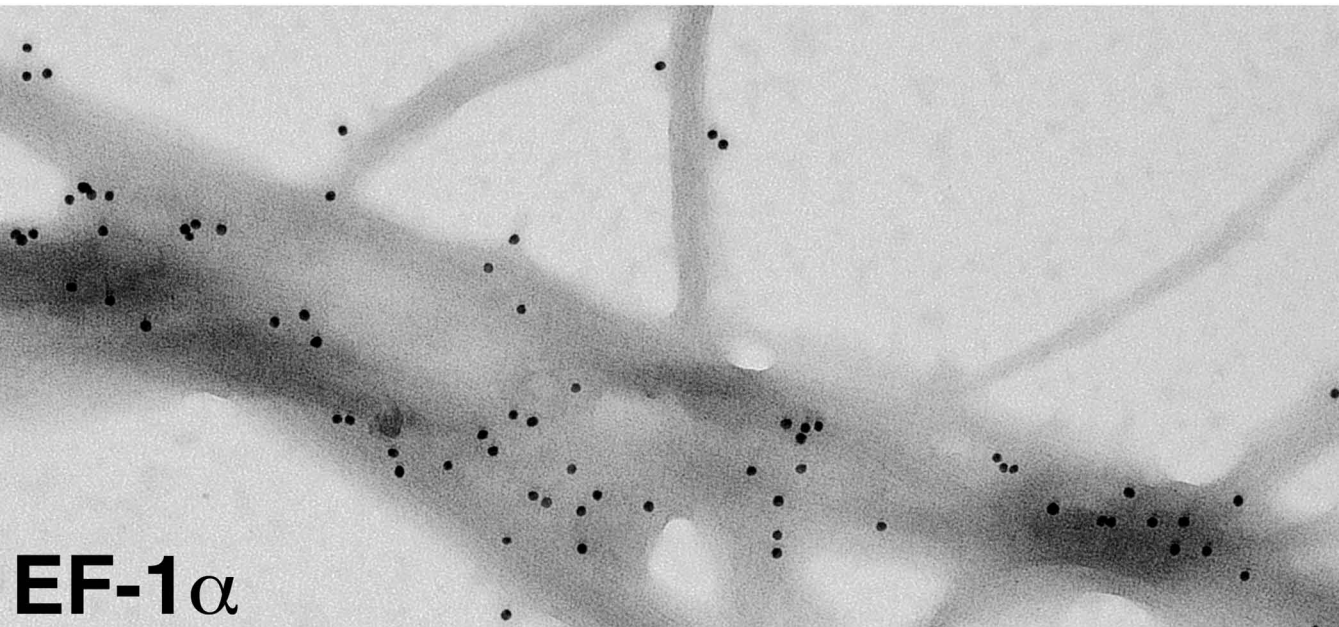

Supplement: mbc_E04-10-0914_4.pdf [file mbc_E04-10-0914_4.pdf]

**A**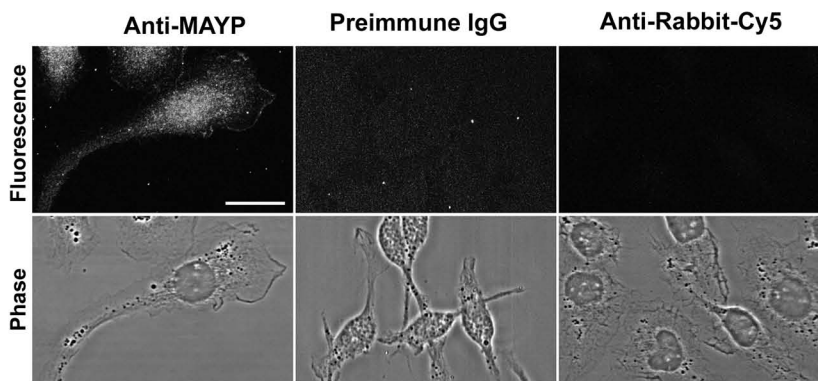**B**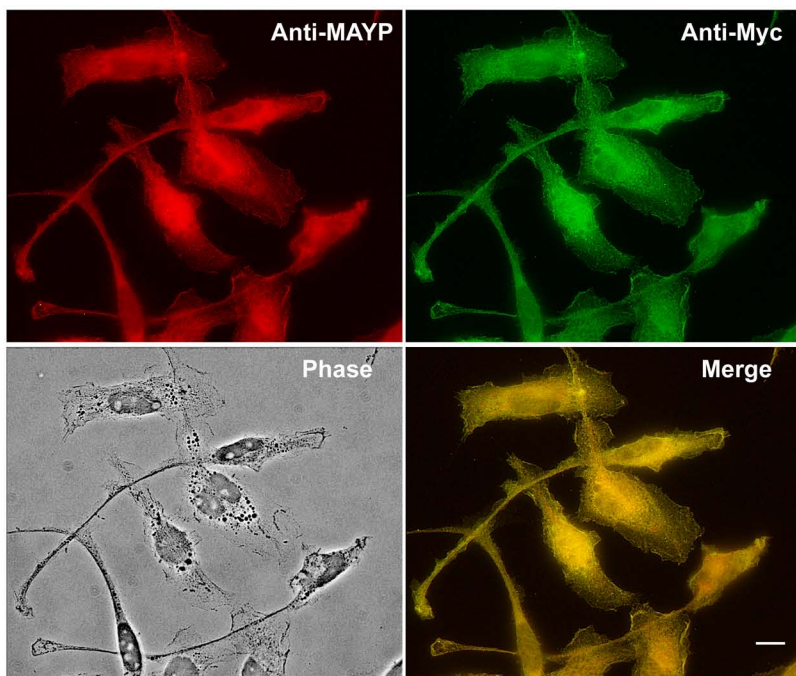**C**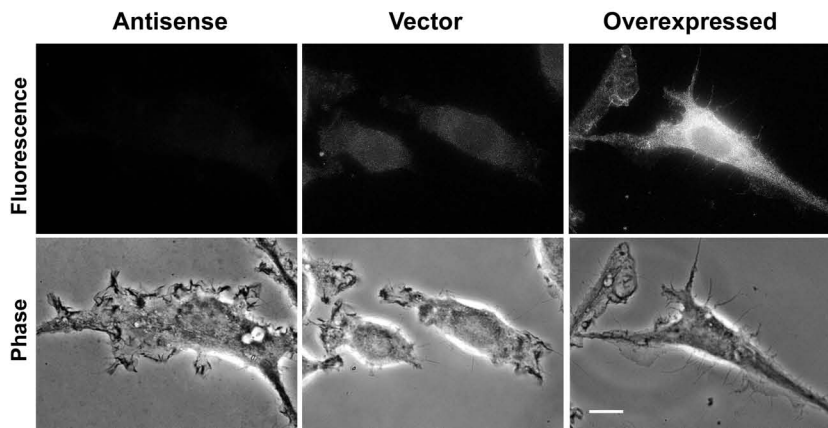

Supplement: mbc_E04-10-0914_5.pdf [file mbc_E04-10-0914_5.pdf]

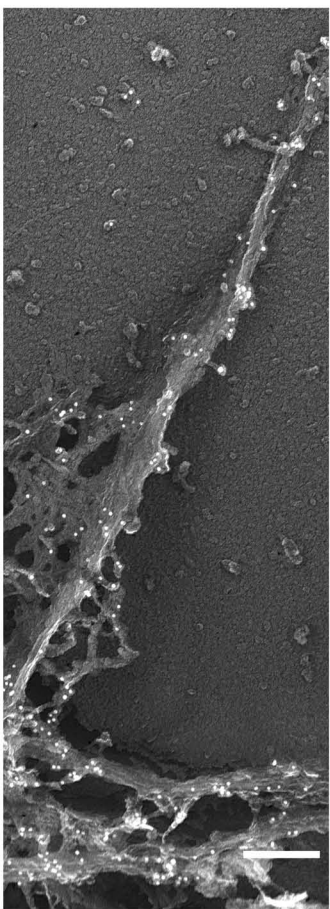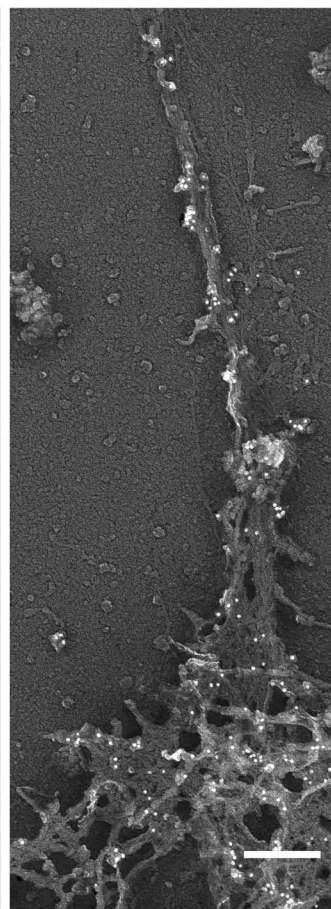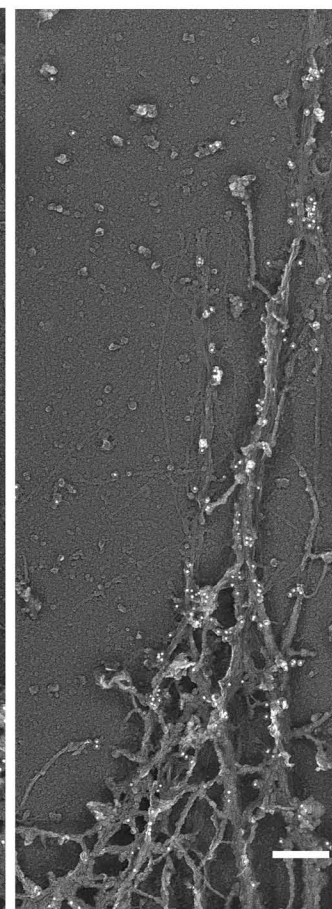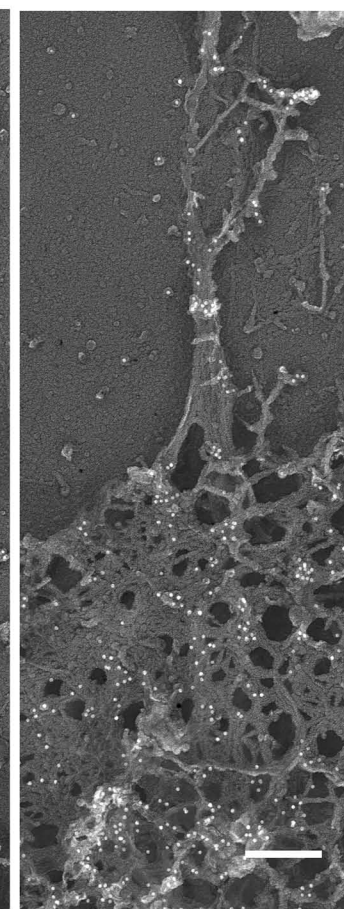

Supplement: mbc_E04-10-0914_6.pdf [file mbc_E04-10-0914_6.pdf]

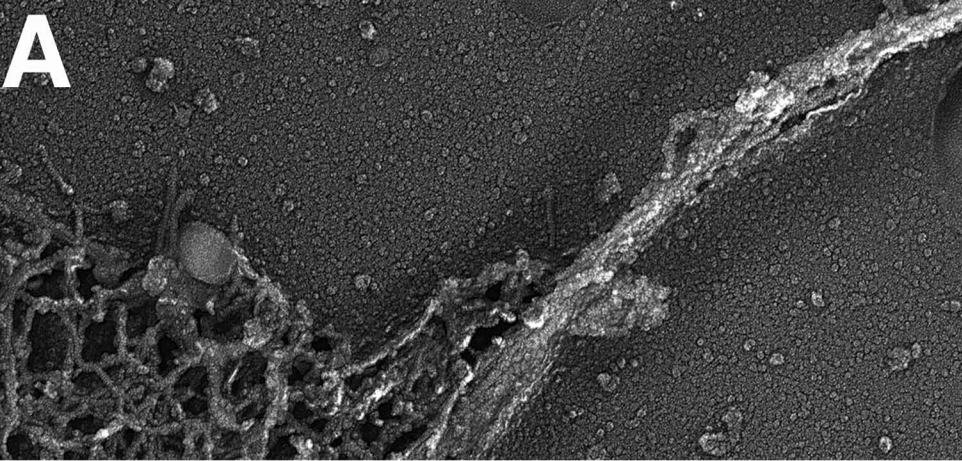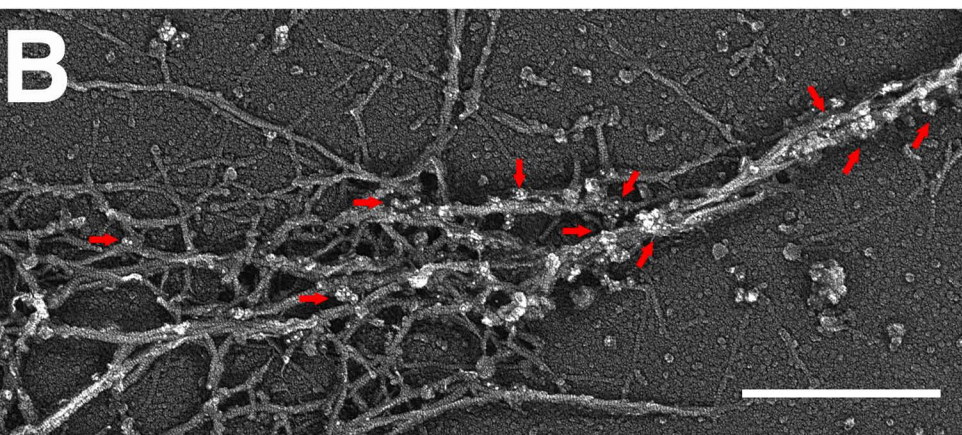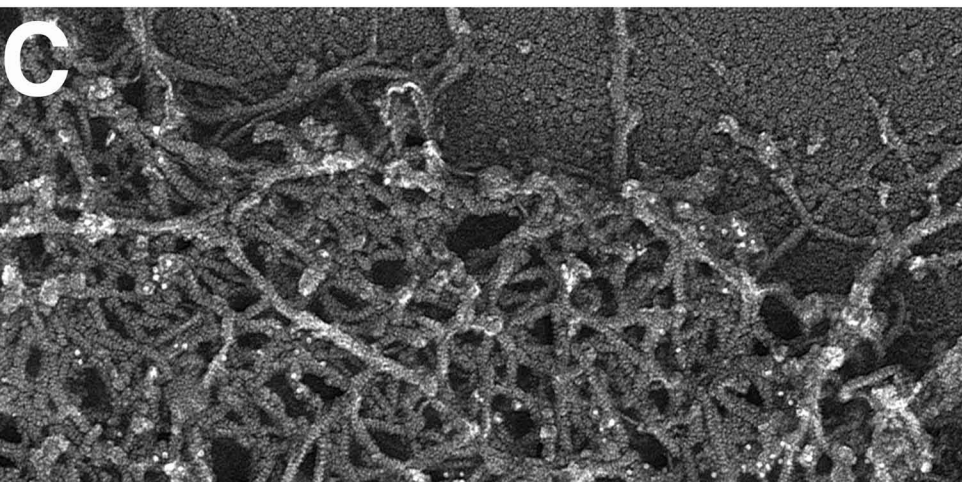

Supplement: mbc_E04-10-0914_7.pdf [file mbc_E04-10-0914_7.pdf]
